# Supplementary material for: Extract from Cucurbita pepo improves BPH symptoms without affecting sexual function: a 24-month noninterventional study
Source: PubMed Central journal article supplement (PMC9236993; doi:10.1007/s00345-022-04036-w), 2022-05-27
Supplement: 345_2022_4036_MOESM1_ESM.pdf [file 345_2022_4036_MOESM1_ESM.pdf]

**Supplementary data**

**Extract from *Cucurbita pepo* improves BPH symptoms without affecting sexual function: a 24-month noninterventional study**

Gerit Theil · Michael Richter · Matthias Schulze · Tilo Köttig · Brigitte Patz · Stefan Heim · Yvonne Krauß · Miroslav Markov · Paolo Fornara

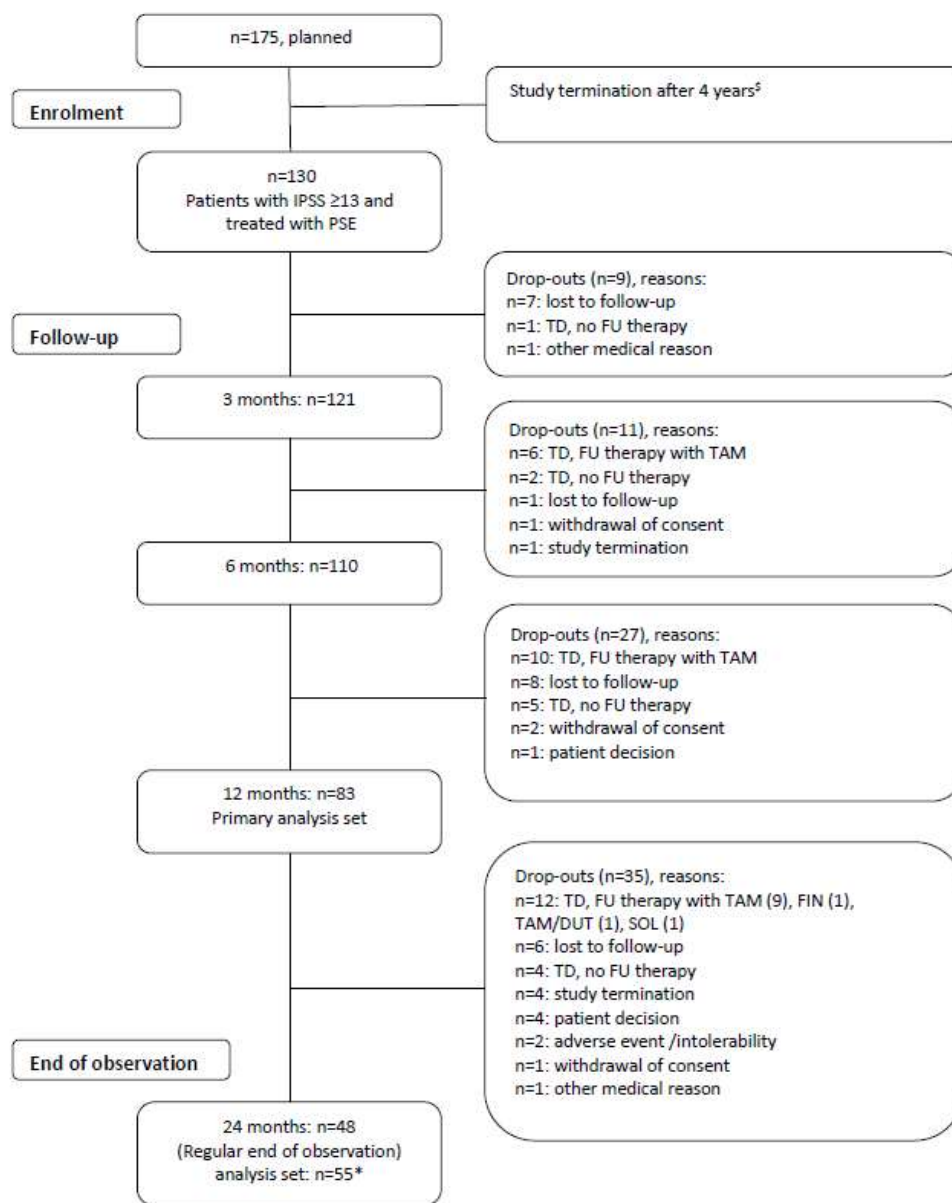

### Supplementary Figure 1

**Patient flow: The number of patients at baseline, 3, 6, 12 and 24 months and reasons for drop-out.**

**Footnotes:** § Study was terminated due to slow patient recruitment. \* The 24-month analysis included the data of 55 patients (48 with regular end at 24 months and 7 with last visits deviating from the 24-month schedule).

**Abbreviations:** PSE, pumpkin seed soft extract; TD, treatment discontinuation; FU, Follow-up; TAM, Tamsulosin; FIN, finasteride; TAM/DUT, combination tamsulosin/dutasteride; SOL, solifenacin. Overall, 28 patients switched to FU with a synthetic drug. At the time of drop-out, the IPSS was lower, unchanged, and maximum 2 points higher than at baseline in 21, 3, and 3 of these patients, respectively. No follow-up IPSS was available for 1 patient.

## Supplementary Table 1

### IPSS-related Quality of life (QoL) through 24-month treatment with pumpkin seed soft extract

| IPSS-QoL, proportion of patients        |                |              |                          |             |                             |              |               |
|-----------------------------------------|----------------|--------------|--------------------------|-------------|-----------------------------|--------------|---------------|
| Score                                   | 0<br>Delighted | 1<br>Pleased | 2<br>Mostly<br>satisfied | 3<br>Mixed* | 4<br>Mostly<br>dissatisfied | 5<br>Unhappy | 6<br>Terrible |
| <b>Baseline (n=83)</b>                  |                |              |                          |             |                             |              |               |
| Number of patients (%)                  | 0 (0.0)        | 1 (1.2)      | 8 (9.6)                  | 40 (48.2)   | 29 (35.0)                   | 2 (2.4)      | 3 (3.6)       |
| Cumulative: n (%)<br><3 and ≥ 3 points# |                | 9 (10.8)     |                          |             | 74 (89.2)                   |              |               |
| <b>3 months (n=83)</b>                  |                |              |                          |             |                             |              |               |
| Number of patients (%)                  | 1 (1.2)        | 11 (13.3)    | 16 (19.3)                | 43 (51.8)   | 10 (12.0)                   | 2 (2.4)      | 0 (0.0)       |
| Cumulative: n (%)<br><3 and ≥ 3 points# |                | 28 (33.8)    |                          |             | 45 (66.2)                   |              |               |
| <b>6 months (n=81)</b>                  |                |              |                          |             |                             |              |               |
| Number of patients (%)                  | 0 (0.0)        | 12 (14.8)    | 33 (40.8)                | 30 (37.0)   | 6 (7.4)                     | 0 (0.0)      | 0 (0.0)       |
| Cumulative: n (%)<br><3 and ≥ 3 points# |                | 45 (55.6)    |                          |             | 36 (44.4)                   |              |               |
| <b>12 months (n=83)</b>                 |                |              |                          |             |                             |              |               |
| Number of patients (%)                  | 0 (0.0)        | 9 (10.8)     | 42 (50.6)                | 27 (32.5)   | 5 (6.0)                     | 0 (0.0)      | 0 (0.0)       |
| Cumulative: n (%)<br><3 and ≥ 3 points# |                | 51 (61.4)    |                          |             | 32 (38.5)                   |              |               |
| <b>24 months (n=55)</b>                 |                |              |                          |             |                             |              |               |
| Number of patients (%)                  | 1 (1.8)        | 8 (14.5)     | 31 (56.4)                | 14 (25.5)   | 1 (1.8)                     | 0 (0.0)      | 0 (0.0)       |
| Cumulative: n (%)<br><3 and ≥ 3 points# |                | 40 (72.7)    |                          |             | 15 (27.3)                   |              |               |

IPSS-QoL, IPSS related quality of life question to be rated on a 7-point scale (If you were to spend the rest of your life with your urinary condition the way it is now, how would you feel about that?); \* mixed: equally satisfied and dissatisfied.

# QoL ≥ 3 points is considered as bothersome

**Supplementary Table 2**  
**AMS total score through 24-month treatment with pumpkin seed soft extract**

| <b>A Absolute scores per visit</b> |                 |             |           |            |           |               |           |            |
|------------------------------------|-----------------|-------------|-----------|------------|-----------|---------------|-----------|------------|
| <b>Visit</b>                       | <b>N</b>        | <b>mean</b> | <b>SD</b> | <b>min</b> | <b>Q1</b> | <b>median</b> | <b>Q3</b> | <b>max</b> |
| <b>Baseline</b>                    | 83              | 24.0        | 9.7       | 17         | 17.0      | 20.0          | 28.7      | 59         |
| <b>3 months</b>                    | 82 <sup>§</sup> | 23.4        | 8.9       | 17         | 17.0      | 19.0          | 28.0      | 59         |
| <b>6 months</b>                    | 83              | 23.6        | 9.1       | 17         | 17.0      | 18.0          | 28.0      | 62         |
| <b>12 months</b>                   | 82 <sup>§</sup> | 23.6        | 9.0       | 17         | 17.0      | 20.6          | 27.0      | 59         |
| <b>24 months</b>                   | 55 <sup>*</sup> | 23.5        | 8.8       | 17         | 17.0      | 17.0          | 28.0      | 54         |

  

| <b>B Changes vs. baseline</b> |                 |                          |           |            |           |               |           |            |
|-------------------------------|-----------------|--------------------------|-----------|------------|-----------|---------------|-----------|------------|
| <b>Visit</b>                  | <b>N</b>        | <b>mean<br/>[95% CI]</b> | <b>SD</b> | <b>min</b> | <b>Q1</b> | <b>median</b> | <b>Q3</b> | <b>max</b> |
| <b>3 months</b>               | 82 <sup>§</sup> | -0.2<br>[-0.9 to 0.4]    | 2.8       | -14        | 0.0       | 0.0           | 0.0       | 11         |
| <b>6 months</b>               | 83              | -0.4<br>[-1.2 to 0.4]    | 3.7       | -16        | -1.0      | 0.0           | 0.0       | 12         |
| <b>12 months</b>              | 82 <sup>§</sup> | -0.5<br>[-1.2 to 0.1]    | 3.0       | -16        | -1.0      | 0.0           | 0.0       | 9          |
| <b>24 months</b>              | 55 <sup>*</sup> | 0.0<br>[-1.0 to 1.0]     | 3.6       | -11        | -1.0      | 0.0           | 0.0       | 15         |

AMS, Aging Male's Symptoms: 17 questions with a 5-point rating scale and score range from 17 to 85.  
n=83, patients treated for 12 months (primary analysis set); § score missing in 1 patient; \*55 patients continued treatment up to 24 months.  
Higher scores indicate a greater negative impact on quality-of-life as follows: none/little 17-26, mild 27-36, moderate 37-49, severe 50-85.

**Supplementary Table 3****AMS sexual subscore through 24-month treatment with pumpkin seed soft extract**

| <b>A Absolute scores per visit</b> |                 |             |           |            |           |               |           |            |
|------------------------------------|-----------------|-------------|-----------|------------|-----------|---------------|-----------|------------|
| <b>Visit</b>                       | <b>N</b>        | <b>mean</b> | <b>SD</b> | <b>min</b> | <b>Q1</b> | <b>median</b> | <b>Q3</b> | <b>max</b> |
| <b>Baseline</b>                    | 83              | 7.7         | 3.7       | 5          | 5.0       | 5.0           | 10.0      | 19         |
| <b>3 months</b>                    | 83              | 7.7         | 3.4       | 5          | 5.0       | 5.0           | 11.0      | 17         |
| <b>6 months</b>                    | 83              | 7.8         | 3.7       | 5          | 5.0       | 5.0           | 10.0      | 18         |
| <b>12 months</b>                   | 82 <sup>§</sup> | 7.9         | 3.7       | 5          | 5.0       | 5.0           | 11.0      | 17         |
| <b>24 months</b>                   | 55 <sup>*</sup> | 7.9         | 3.8       | 5          | 5.0       | 5.0           | 10.0      | 19         |

  

| <b>B changes vs. baseline</b> |                 |                          |           |            |           |               |           |            |
|-------------------------------|-----------------|--------------------------|-----------|------------|-----------|---------------|-----------|------------|
| <b>Visit</b>                  | <b>N</b>        | <b>mean<br/>[95% CI]</b> | <b>SD</b> | <b>min</b> | <b>Q1</b> | <b>median</b> | <b>Q3</b> | <b>max</b> |
| <b>3 months</b>               | 83              | -0.0<br>[-0.5 to 0.5]    | 2.2       | -10        | 0.0       | 0.0           | 1.0       | 5          |
| <b>6 months</b>               | 83              | 0.1<br>[-0.2 to 0.4]     | 1.5       | -6         | 0.0       | 0.0           | 1.0       | 5          |
| <b>12 months</b>              | 82 <sup>§</sup> | 0.1<br>[-0.2 to 0.5]     | 1.7       | -7         | 0.0       | 0.0           | 0.0       | 7          |
| <b>24 months</b>              | 55 <sup>*</sup> | 0.3<br>[-0.2 to 0.7]     | 1.7       | -4         | 0.0       | 0.0           | 0.0       | 6          |

AMS, Aging Male's Symptoms sexual subscore: 5 questions with a 5-point rating scale and score range from 5 to 25. n=83, patients treated for 12 months (primary analysis set); § score missing in 1 patient; \*55 patients continued treatment up to 24 months.

Higher scores indicate a greater negative impact on quality-of-life.

**Supplementary Table 4****AMS psychological subscore through 24-month treatment with pumpkin seed soft extract**

| <b>A Absolute scores per visit</b> |                 |             |           |            |           |               |           |            |
|------------------------------------|-----------------|-------------|-----------|------------|-----------|---------------|-----------|------------|
| <b>Visit</b>                       | <b>N</b>        | <b>mean</b> | <b>SD</b> | <b>min</b> | <b>Q1</b> | <b>median</b> | <b>Q3</b> | <b>max</b> |
| <b>Baseline</b>                    | 83              | 6.1         | 2.5       | 5          | 5.0       | 5.0           | 6.0       | 19         |
| <b>3 months</b>                    | 82 <sup>§</sup> | 6.0         | 2.3       | 5          | 5.0       | 5.0           | 7.0       | 19         |
| <b>6 months</b>                    | 83              | 5.9         | 2.4       | 5          | 5.0       | 5.0           | 6.0       | 22         |
| <b>12 months</b>                   | 82 <sup>§</sup> | 5.9         | 2.3       | 5          | 5.0       | 5.0           | 6.0       | 19         |
| <b>24 months</b>                   | 55 <sup>*</sup> | 5.9         | 2.0       | 5          | 5.0       | 5.0           | 6.0       | 14         |

  

| <b>B Changes vs. baseline</b> |                 |                         |           |            |           |               |           |            |
|-------------------------------|-----------------|-------------------------|-----------|------------|-----------|---------------|-----------|------------|
| <b>Visit</b>                  | <b>N</b>        | <b>mean</b><br>[95% CI] | <b>SD</b> | <b>min</b> | <b>Q1</b> | <b>median</b> | <b>Q3</b> | <b>max</b> |
| <b>3 months</b>               | 82 <sup>§</sup> | -0.0<br>[-0.2 to 0.2]   | 1.0       | -4         | 0.0       | 0.0           | 0.0       | 3          |
| <b>6 months</b>               | 83              | -0.1<br>[-0.4 to 0.2]   | 1.4       | -5         | 0.0       | 0.0           | 0.0       | 5          |
| <b>12 months</b>              | 82 <sup>§</sup> | -0.2<br>[-0.4 to 0.1]   | 1.0       | -5         | 0.0       | 0.0           | 0.0       | 3          |
| <b>24 months</b>              | 55 <sup>*</sup> | 0.0<br>[-0.3 to 0.4]    | 1.3       | -5         | 0.0       | 0.0           | 0.0       | 5          |

AMS, Aging Male's Symptoms psychological subscore: 5 questions with a 5-point rating scale and score range from 5 to 25. n=83, patients treated for 12 months (primary analysis set); § score missing in 1 patient; \*55 patients continued treatment up to 24 months.

Higher scores indicate a greater negative impact on quality-of-life.

**Supplementary Table 5****AMS somatic subscore through 24-month treatment with pumpkin seed soft extract**

| <b>A Absolute scores per visit</b> |                 |             |           |            |           |               |           |            |
|------------------------------------|-----------------|-------------|-----------|------------|-----------|---------------|-----------|------------|
| <b>Visit</b>                       | <b>N</b>        | <b>mean</b> | <b>SD</b> | <b>min</b> | <b>Q1</b> | <b>median</b> | <b>Q3</b> | <b>max</b> |
| <b>Baseline</b>                    | 83              | 10.2        | 4.6       | 7          | 7.0       | 8.0           | 12.0      | 26         |
| <b>3 months</b>                    | 83              | 9.8         | 3.9       | 7          | 7.0       | 7.0           | 12.0      | 23         |
| <b>6 months</b>                    | 83              | 9.9         | 3.9       | 7          | 7.0       | 7.0           | 12.0      | 23         |
| <b>12 months</b>                   | 82 <sup>§</sup> | 9.8         | 4.0       | 7          | 7.0       | 7.5           | 11.0      | 23         |
| <b>24 months</b>                   | 55 <sup>*</sup> | 9.6         | 4.0       | 7          | 7.0       | 7.0           | 11.0      | 25         |

  

| <b>B Changes vs. baseline</b> |                 |                          |           |            |           |               |           |            |
|-------------------------------|-----------------|--------------------------|-----------|------------|-----------|---------------|-----------|------------|
| <b>Visit</b>                  | <b>N</b>        | <b>mean<br/>[95% CI]</b> | <b>SD</b> | <b>min</b> | <b>Q1</b> | <b>median</b> | <b>Q3</b> | <b>max</b> |
| <b>3 months</b>               | 83              | -0.5<br>[-0.9 to -0.1]   | 2.0       | -14        | -1.0      | 0.0           | 0.0       | 4          |
| <b>6 months</b>               | 83              | -0.4<br>[-0.9 to 0.1]    | 2.2       | -10        | -1.0      | 0.0           | 0.0       | 6          |
| <b>12 months</b>              | 82 <sup>§</sup> | -0.5<br>[-1.0 to -0.1]   | 2.0       | -9         | -1.0      | 0.0           | 0.0       | 6          |
| <b>24 months</b>              | 55 <sup>*</sup> | -0.3<br>[-0.8 to 0.1]    | 1.7       | -5         | -1.0      | 0.0           | 0.0       | 7          |

AMS, Aging Male's Symptoms somatic subscore: 7 questions with a 5-point rating scale and score range from 5 to 35. n=83, patients treated for 12 months (primary analysis set); § score missing in 1 patient; \*55 patients continued treatment up to 24 months.

Higher scores indicate a greater negative impact on quality-of-life.

**Supplementary Table 6**  
**IIEF-5 score through 24-month treatment with pumpkin seed soft extract**

| <b>A Absolute scores per visit</b> |                 |             |           |            |           |               |           |            |
|------------------------------------|-----------------|-------------|-----------|------------|-----------|---------------|-----------|------------|
| <b>Visit</b>                       | <b>N</b>        | <b>mean</b> | <b>SD</b> | <b>min</b> | <b>Q1</b> | <b>median</b> | <b>Q3</b> | <b>max</b> |
| <b>Baseline</b>                    | 83              | 16.4        | 5.7       | 1          | 14.0      | 19.0          | 20.0      | 25         |
| <b>3 months</b>                    | 83              | 16.6        | 6.0       | 1          | 15.0      | 20.0          | 20.0      | 25         |
| <b>6 months</b>                    | 83              | 16.9        | 6.0       | 1          | 15.0      | 20.0          | 20.0      | 25         |
| <b>12 months</b>                   | 82 <sup>§</sup> | 16.7        | 6.3       | 1          | 16.0      | 20.0          | 20.0      | 24         |
| <b>24 months</b>                   | 55 <sup>*</sup> | 15.7        | 7.0       | 1          | 13.0      | 20.0          | 20.0      | 24         |

  

| <b>B Changes vs. baseline</b> |                 |                          |           |            |           |               |           |            |
|-------------------------------|-----------------|--------------------------|-----------|------------|-----------|---------------|-----------|------------|
| <b>Visit</b>                  | <b>N</b>        | <b>mean<br/>[95% CI]</b> | <b>SD</b> | <b>min</b> | <b>Q1</b> | <b>median</b> | <b>Q3</b> | <b>max</b> |
| <b>3 months</b>               | 83              | 0.2<br>[-0.4 to -0.8]    | 2.7       | -11        | 0.0       | 0.0           | 1.0       | 6          |
| <b>6 months</b>               | 83              | 0.5<br>[-0.3 to 1.3]     | 3.8       | -13        | 0.0       | 0.0           | 1.0       | 17         |
| <b>12 months</b>              | 82 <sup>§</sup> | 0.3<br>[-0.5 to 1.1]     | 3.7       | -13        | 0.0       | 0.0           | 1.0       | 15         |
| <b>24 months</b>              | 55 <sup>*</sup> | -0.7<br>[-2.0 to 0.6]    | 4.8       | -15        | -1.0      | 0.0           | 0.0       | 15         |

IIEF-5, abridged International Index of Erectile Function (5 questions) with 5-point scale; score range from 1 to 25 specifying the degree of erectile dysfunction (ED) as follows: severe 1-7, mild 8-11, mild to moderate: 12-16, mild: 17-21, no ED (>21)  
n=83, patients treated for 12 months (primary analysis set); § missing value for 1 patients; \*55 patients continued treatment up to 24 months.
